# Supplementary material
Source: Research Square preprint supplement (doi:10.21203/rs.3.rs-9364022/v1)
Supplement: Supplementary file 1 [file 0d5102ac700fe60b88590d11.docx]

| **Table 1: Layer-based classification of IRGs across thymus, spleen, and lymph nodes under spaceflight stress** | | | | | | | | |
| --- | --- | --- | --- | --- | --- | --- | --- | --- |
| **Layer** | **Short name / One-line description** | **TH-specific (24)** | **SP-specific (18)** | **LN-specific (43)** | **TH-LN (18)** | **SP-TH (6)** | **LN-SP (11)** | **TH-LN-SP (12)** |
| L1 | FA / CSK mechanical input Integrins, actin/MT and focal-adhesion modules sensing tension and shear. | *Septin1 S100pbp* | *Fhod1 Arhgap30* | *Capg Arhgap9 Arhgef2 Nckap1l* | *Ilk* |  | *Cap1 Pafah1b1* | *Arhgef1 Arhgap4 Fermt3* |
| L2 | Signaling / Checkpoint gate Kinases, phosphatases and adaptors gating receptor and cell-cycle signals. | *Rapgef3 Gsk3a Ccng2* | *Dok3 Cdkn1b Anapc5 Mark3* | *Ptpn6 Nfkb2 Irf3 Prkcd Grk2 Peli1 Apobec3 Sun2 Calm2 Gnb2 Madd Ostf1 Pip4p1* | *Ly6e Coro1b* | *Traf3ip3* | *Map4k2 Siglecg* | *Rasal3* |
| L3 | Nuclear / Genome-integrity DNA repair, replication fork and chromatin regulators under mechanical and radiative stress. | *Arid1a Nabp1 Oga Ptov1 Safb2 Smarcd2* | *H3f3b Mta2 Nsd1 Sirt7 Ubp1* | *Brd2 Nrbp1 Parp3 Sp110* | *Fubp1 Uspl1* | *Hdac7* | *Akap8 Trp53i11* | *Elf2* |
| L4 | RNA / Proteostasis / Trafficking Splicing/IR factors, translation and chaperone/vesicle systems tuning protein output. | *Rab24 Ctsa Fth1 Nxf1 Pan3 Rbm25 Rbm3 Srsf5 Srsf7 Tial1 Arpp21 Rpl10a* | *Vars Gtpbp2 Snx5 Dennd1c Ccnl1 Hnrnpl Srrm1* | *Vps28 Tmem208 Colgalt1 Use1 Cct2 Chtop Ddx3x Luc7l3 Riok3 Snrpb Srpk1 Syf2 Xrn2 Arrdc1 Plekhj1 Rabgap1l Rnf44 Rpl34 Rps18* | *Gramd1a Atp13a1 Stub1 Uba7 Hsp90b1 Acap1 Tecpr1 Clk3 Hnrnpm Ptbp1 Eif4a1 Prelid1 Rps5* | *Psmb8 Emg1 Pnisr* | *Cct3 Eef1a1 Ccnl2 Rsrp1 Sf3b1* | *Hspa8 Gdi1 Rnf167 Slc44a2 Gas5 Hnrnph1* |
| L5 | Immune–metabolic adaptive output Transcriptional and metabolic modules shaping cytokine, IFN and long-term immune states. | *Prss16* |  | *Cd55 Cnbp Slc1a5* |  | *Mat2a* |  | *Ucp2* |

Notes: Columns list IRGs that were (1) specific to each organ (thymus, lymph nodes, spleen), (2) shared between two organs (TH–LN, LN–SP, SP–TH), or (3) universally shared by all three organs (TH–LN–SP).

This table summarises the organ-specific and shared intron-retention genes (IRGs) identified under spaceflight stress (microgravity plus radiation), organised according to the updated five-layer mechanotransduction framework shown in Figure 3.

Layer 1 corresponds to FA/CSK mechanical input, Layer 2 to signaling/checkpoint gating, Layer 3 to nuclear/genome integrity, Layer 4 to RNA/proteostasis/trafficking, and Layer 5 to immune–metabolic adaptive outputs.
