# Supplementary material
Source: Research Square preprint supplement (doi:10.21203/rs.3.rs-9364022/v1)
Supplement: Supplementary file 2 [file 2f723edabcc1dd0dd388969c.docx]

| **Category** | **Gene** | **Functional Node** | **TH** | **SP** | **LN** | **IR event coordinate(s)** | **Event logic** | **Vector interpretation (key point)** | **Evidence (original paper; ultra-brief takeaway)** |
| --- | --- | --- | --- | --- | --- | --- | --- | --- | --- |
| **A** | ***Hdac7*** | Selection threshold (negative selection / transcriptional gate) | IncIR | IncIR | – | **TH=SP**: chr15:97800803–97802074 | **SSD** | **Shared IncIR of the same event in TH and SP** → downshift of the HDAC7-dependent decision module (output reads as thymic selection vs peripheral T-cell responses). | Dequiedt 2003: HDAC7 tunes TCR-dependent transcription (MEF2/Nur77 axis) and thymic selection thresholds. Ref.74 |
| **A** | ***Traf3ip3*** | Positive selection (TCR→ERK relay) | IncIR | IncIR | – | **TH=SP**: chr1:193194550–193194823 | **SSD** | **Same-event IncIR shared by TH and SP** → shared downshift of the TCR→ERK relay (thymus: positive selection; spleen: activation quality). | Zou 2015: Golgi-localized TRAF3IP3 relays TCR→ERK signaling and is required for thymocyte positive selection. Ref.78 |
| **A** | ***Prss16*** | cTEC antigen processing (TSSP) | IncIR | – | – | **TH-only**: chr13:22003072–22003144 | **THO** | **Thymus-specific suppressive vector** consistent with reduced antigen-processing demand in a weakened thymus (IncIR). | Gommeaux 2009: TSSP/PRSS16 in cTECs shapes CD4 selection through antigen processing. Ref.58,59 |
| **A** | ***Psmb8*** | Immunoproteasome (processing / proteostasis) | DecIR | IncIR | – | **TH=SP**: chr17:34200271–34200709 | **SF** | **Same-event polarity flip**: TH shows compensatory **DecIR** (restore function) whereas SP shows suppressive **IncIR** (dampen output). | C. St-Pierre 2017: The immunoproteasome supports mTEC proteostasis under proteotoxic stress and helps maintain thymic epithelial homeostasis. Ref.84 |
| **A** | ***Ucp2*** | Efferocytosis / metabolism–ROS (homeostasis) | IncIR | DecIR | DecIR | **TH=SP=LN**: chr7:100494376–100496724 | **SF** | **Same-event polarity flip (TH vs SP/LN)**: TH shows suppressive IncIR, while SP/LN show compensatory DecIR to sustain phagocyte endurance/ROS control. | **Park 2011:** UCP2 enables continuous clearance of apoptotic cells, preventing secondary necrosis/inflammatory spillover and helping maintain tissue homeostasis.　Ref.46 |
| **A** | ***Gsk3a*** | Thymocyte egress (exit program) | DecIR | – | – | **TH-only**: chr7:25229573–25229849 | **THO** | **Thymus-specific compensatory DecIR** consistent with restoring the egress/exit program. | Liu 2021: GSK3 drives thymocyte egress via the Foxo1–Klf2–S1pr1 axis. Ref.85 |
| **B** | ***Ilk*** | FA/CSK entry node (adhesion–tension–survival) | DecIR | – | DecIR | TH: chr7:105740868–105740958 / LN: chr7:105741484–105741578 | **ES** | **Same direction (DecIR) but different intron “knobs”** across TH vs LN → organ-specific event selection for compensatory restoration of ILK. | Liu 2005: T cell–specific ILK loss perturbs T-cell migration/survival, consistent with an integrin-linked survival/adhesion hub. Ref.86 |
| **B** | ***Fermt3*** | Integrin activation (inside-out) | IncIR | DecIR | IncIR | TH/LN: chr19:7001882–7002211 / SP: chr19:7002947–7003029 | **ES** | **Event split**: TH/LN share the same-event **IncIR** (downshift integrin activation), while SP uses a different event with **DecIR** (compensatory restore). | Moretti 2018: Kindlin-3 (FERMT3) is required for thymic homing of T-cell progenitors and thymopoiesis. Ref.87 |
| **C** | ***Arid1a*** | Chromatin (SWI/SNF) | IncIR | – | – | **TH-only**: chr4:133695662–133695914 | **THO** | **Thymus-only suppressive IncIR** suggests downshifting chromatin remodeling capacity (program “budget cut” under thymic stress). | Yang 2022: ARID1A loss in the T-cell lineage disrupts early thymic development/β-selection. Ref.88 |
| **C** | ***Hsp90b1*** | ER chaperone (receptor maturation / niche adhesion) | DecIR | – | IncIR | **TH=LN**: chr10:86691749–86692138 | **SF** | **Same-event polarity flip (TH vs LN)**: TH shows compensatory DecIR, LN shows suppressive IncIR, implying organ-specific tuning of gp96 capacity. | Staron 2010: gp96/GRP94 (HSP90B1) selectively controls T- and B-cell development via ER chaperoning of key client receptors. Ref.69 |
| **C** | ***Fth1*** | Iron/oxidative homeostasis (stress-resilience baseline) | DecIR | – | – | **TH-only**: chr19:9984328–9984558 | **THO** | **Thymus-only compensatory DecIR** consistent with restoring iron/ROS buffering capacity. | Wu 2024: Ferritin heavy chain supports FOXP3 transcription and Treg stability. Ref.89 |
| **C** | ***Stub1*** | Ubiquitin–proteostasis (baseline stress control) | DecIR | – | DecIR | **TH=LN**: chr17:25831219–25831307 | **SSD** | **Shared DecIR of the same event in TH and LN** → compensatory restoration of proteostasis (and potentially Treg stability). | Chen 2013: STUB1/CHIP promotes FOXP3 turnover and tunes Treg function. Ref.70 |
| **C** | ***Ptbp1*** | RNA binding/splicing (baseline state control) | IncIR | – | IncIR | **TH=LN**: chr10:79859523–79859600 | **SSD** | **Shared IncIR of the same event in TH and LN** → shared downshift of PTBP1-linked splicing capacity/state control. | D’Angeli 2022: PTBP1 is important for T-cell activation programs (with context-dependent effects on development). Ref.90 |
| **C** | ***Rpl10a*** | Translation/ribosome (capacity baseline) | DecIR | – | – | **TH-only**: chr17:28329048–28329372 | **THO** | **Thymus-only compensatory DecIR** consistent with restoring translational capacity/ribosome function. | Lawir 2020: Disrupted rpl10a splicing contributes to impaired T-cell development (model system). Ref.61 |
